# Supplementary material for: Characterization of a new rice glutelin gene GluD-1 expressed in the starchy endosperm
Source: PubMed Central journal article supplement — J Exp Bot. 2008 Nov 2;59(15):4233–45. doi: 10.1093/jxb/ern265 (PMC2639022; doi:10.1093/jxb/ern265), 2008-11-02
Supplement: ern265_1.pdf [file ern265_1.pdf]

## **Characterization of a new rice glutelin gene *GluD-1* expressed in the starchy endosperm**

Taiji Kawakatsu, Masayuki P Yamamoto, Sakiko Hirose, Masahiro Yano, and  
Fumio Takaiwa

### **Supplementary Material**

Supplementary Fig. 1. Alignment of rice glutelin genes used for drawing a phylogenetic tree.

Supplementary Fig. 2. Mapping of glutelin a4 gene and a phylogenetic tree of rice glutelins.

Supplementary Fig. 3. Alignment of *GluD-1* cDNAs among cultivars Nipponbare, Wataribune 2, Kasalath and Nona Bokra.

Supplementary Fig. 4. Alignment of *GluD-1* among cultivars Nipponbare, Wataribune 2, Kasalath and Nona Bokra.

↓

GluA1 1 --MASINRPVIFVTVCLFLCNGSLAQQLLQGSTISQVSSRRGSPRECFRDLQAFEPTRVRSVSOAGTEFFDVSNB-LFQCTGVSVVRRVIEPRGLLLP  
GluA2 1 --MASINRPVIFVTVCLFLCNGSLAQQLLQGSTISQVSSRRGSPRGCFRDLQAFEPTRVRSVSOAGTEFFDVSNB-LFQCTGVSVVRRVIEPRGLLLP  
GluA3 1 --MATIKFPVFSVCLFLCNGSLAQQLS-QSTISQVSSRRGSPRECFRDLQAFEPTRVRSVSOAGTEFFDVSNB-LFQCTGVSVVRRVIEPRGLLLP  
GluA4 1 --TATIKFPVFSVCLFLCNGSLAQQLS-QSTISQVSSRRGSPRECFRDLQAFEPTRVRSVSOAGTEFFDVSNB-LFQCTGVSVVRRVIEPRGLLLP  
GluB1a/b 1 ---MASSVFRSFSIYFCVLLCHGSMALQFNPNPNPWSPROGSPRECFRDLQAFEPTRVRSVSOAGTEFFDVSNB-LFQCTGVSVVRRVIEPRGLLLP  
GluB2 1 ---MATITFSRFSIYFCVLLCHGSMALQFNPNPNPWSPROGSPRECFRDLQAFEPTRVRSVSOAGTEFFDVSNB-LFQCTGVSVVRRVIEPRGLLLP  
GluB3 1 ---MATVTSQFSIYFCVLLVHDSMAQLFYPTRPNPWSPROGSPRECFRDLQAFEPTRVRSVSOAGTEFFDVSNB-LFQCTGVSVVRRVIEPRGLLLP  
GluB4/5 1 ---MATIAFRSISYFCVLLCHGSMALQFNPNPNPWSPROGSPRECFRDLQAFEPTRVRSVSOAGTEFFDVSNB-LFQCTGVSVVRRVIEPRGLLLP  
GluB6 1 ---MITSVFRSFSIYFCVLLCNGSMALQFPDPAINQVQHROGSPRECFRDLQAFEPTRVRSVSOAGTEFFDVSNB-LFQCTGVSVVRRVIEPRGLLLP  
GluB7 1 ---MATIAFRSISYFCVLLCHGSMALQFSLGNPNWSPROGSPRECFRDLQAFEPTRVRSVSOAGTEFFDVSNB-LFQCTGVSVVRRVIEPRGLLLP  
GluC1 1 MASMSIILPLCLGLLFFQVSMQAFSFGGSPLOPRGFRGDDSRHOCRFELTALBATHOQRSEAGTEFFYNI EARNRFRFCAGSVRRLLVIESKGLVLP  
GluC2 1 MASVSTVPLCLGLLFFQVSMQAFSFGGSPLOPRGFRGDDSRHOCRFELTALBATHOQRSEAGTEFFYNI EARNRFRFCAGSVRRLLVIESKGLVLP  
GluD1 1 ---MATTITLLSSLLCALLLAP----LFSQGDVADES--RQGSAROCFRDLQAFEPTRVRSVSOAGTEFFDVSNB-LFQCTGVSVVRRVIEPRGLLLP

GluA1 98 HYTNASLVYIQGRGITPTFPFGCPETYQQQFQSQGQA--QLTESQSQSKFIDEHQKIHFRQGDVIALPAGVAHWYNDGEPVVAIYYVDINNGAN  
GluA2 98 HYTNASLVYIQGRGITPTFPFGCPETYQQQFQSQGQA--QLTESQSQSKFIDEHQKIHFRQGDVIALPAGVAHWYNDGEPVVAIYYVDINNGAN  
GluA3 98 HYSNGATLVYIQGRGITPTFPFGCPETYQQQFQSQGQA--QLTESQSQSKFIDEHQKIHFRQGDVIALPAGVAHWYNDGEPVVAIYYVDINNGAN  
GluA4 98 HYSNGVTLVYIQGRGITPTFPFGCPETYQQQFQSQGQA--QLTESQSQSKFIDEHQKIHFRQGDVIALPAGVAHWYNDGEPVVAIYYVDINNGAN  
GluB1a/b 98 RYNTNIPGVYIYIQGRGITPTFPFGCPETYQQQFQSQGQA--QLTESQSQSKFIDEHQKIHFRQGDVIALPAGVAHWYNDGEPVVAIYYVDINNGAN  
GluB2 98 RYNTNIPGVYIYIQGRGITPTFPFGCPETYQQQFQSQGQA--QLTESQSQSKFIDEHQKIHFRQGDVIALPAGVAHWYNDGEPVVAIYYVDINNGAN  
GluB3 98 RYNTNIPGVYIYIQGRGITPTFPFGCPETYQQQFQSQGQA--QLTESQSQSKFIDEHQKIHFRQGDVIALPAGVAHWYNDGEPVVAIYYVDINNGAN  
GluB4/5 98 RYNTNIPGVYIYIQGRGITPTFPFGCPETYQQQFQSQGQA--QLTESQSQSKFIDEHQKIHFRQGDVIALPAGVAHWYNDGEPVVAIYYVDINNGAN  
GluB6 98 RYNTNIPGVYIYIQGRGITPTFPFGCPETYQQQFQSQGQA--QLTESQSQSKFIDEHQKIHFRQGDVIALPAGVAHWYNDGEPVVAIYYVDINNGAN  
GluB7 98 RYNTNIPGVYIYIQGRGITPTFPFGCPETYQQQFQSQGQA--QLTESQSQSKFIDEHQKIHFRQGDVIALPAGVAHWYNDGEPVVAIYYVDINNGAN  
GluC1 101 MYANAHKLVYIYIQGRGITPTFPFGCPETYQQQFQSQGQA--QLTESQSQSKFIDEHQKIHFRQGDVIALPAGVAHWYNDGEPVVAIYYVDINNGAN  
GluC2 101 MYANAHKLVYIYIQGRGITPTFPFGCPETYQQQFQSQGQA--QLTESQSQSKFIDEHQKIHFRQGDVIALPAGVAHWYNDGEPVVAIYYVDINNGAN  
GluD1 90 RYNTNIPGVYIYIQGRGITPTFPFGCPETYQQQFQSQGQA--QLTESQSQSKFIDEHQKIHFRQGDVIALPAGVAHWYNDGEPVVAIYYVDINNGAN

GluA1 196 QLDPQRDFLLAGNKRNP--QAYRREVEERSQ---NITFSGFSTELLSEALGYSQVAVRLOQCQNDORGETVIRVEHGLSLLLPYASLQEQEQGVQSRERY  
GluA2 196 QLDPQRDFLLAGNKRNP--QAYRREVEERSQ---NITFSGFSTELLSEALGYSQVAVRLOQCQNDORGETVIRVEHGLSLLLPYASLQEQEQGVQSRERY  
GluA3 195 QLDPQRDFLLAGNKRNP--QAYRREVEERSQ---NITFSGFSTELLSEALGYSQVAVRLOQCQNDORGETVIRVEHGLSLLLPYASLQEQEQGVQSRERY  
GluA4 195 QLDPQRDFLLAGNKRNP--QAYRREVEERSQ---NITFSGFSTELLSEALGYSQVAVRLOQCQNDORGETVIRVEHGLSLLLPYASLQEQEQGVQSRERY  
GluB1a/b 191 QLEPRQKEFLLAGNKRNP--QAYRREVEERSQ---NITFSGFSTELLSEALGYSQVAVRLOQCQNDORGETVIRVEHGLSLLLPYASLQEQEQGVQSRERY  
GluB2 191 QLEPRQKEFLLAGNKRNP--QAYRREVEERSQ---NITFSGFSTELLSEALGYSQVAVRLOQCQNDORGETVIRVEHGLSLLLPYASLQEQEQGVQSRERY  
GluB3 190 QLEPRQKEFLLAGNKRNP--QAYRREVEERSQ---NITFSGFSTELLSEALGYSQVAVRLOQCQNDORGETVIRVEHGLSLLLPYASLQEQEQGVQSRERY  
GluB4/5 191 QLEPRQKEFLLAGNKRNP--QAYRREVEERSQ---NITFSGFSTELLSEALGYSQVAVRLOQCQNDORGETVIRVEHGLSLLLPYASLQEQEQGVQSRERY  
GluB6 191 QLEPRQKEFLLAGNKRNP--QAYRREVEERSQ---NITFSGFSTELLSEALGYSQVAVRLOQCQNDORGETVIRVEHGLSLLLPYASLQEQEQGVQSRERY  
GluB7 193 QLEPRQKEFLLAGNKRNP--QAYRREVEERSQ---NITFSGFSTELLSEALGYSQVAVRLOQCQNDORGETVIRVEHGLSLLLPYASLQEQEQGVQSRERY  
GluC1 201 QLDPQRDFLLAGNKRNP--QAYRREVEERSQ---NITFSGFSTELLSEALGYSQVAVRLOQCQNDORGETVIRVEHGLSLLLPYASLQEQEQGVQSRERY  
GluC2 192 QLDPQRDFLLAGNKRNP--QAYRREVEERSQ---NITFSGFSTELLSEALGYSQVAVRLOQCQNDORGETVIRVEHGLSLLLPYASLQEQEQGVQSRERY  
GluD1 184 QLEPRQKEFLLAGNKRNP--QAYRREVEERSQ---NITFSGFSTELLSEALGYSQVAVRLOQCQNDORGETVIRVEHGLSLLLPYASLQEQEQGVQSRERY

↓

GluA1 291 QEGYQQSQ---YGSQVAVRLOQCQNDORGETVIRVEHGLSLLLPYASLQEQEQGVQSRERY  
GluA2 291 QEGYQQSQ---YGSQVAVRLOQCQNDORGETVIRVEHGLSLLLPYASLQEQEQGVQSRERY  
GluA3 290 QEGYQQSQ---YGSQVAVRLOQCQNDORGETVIRVEHGLSLLLPYASLQEQEQGVQSRERY  
GluA4 290 QEGYQQSQ---YGSQVAVRLOQCQNDORGETVIRVEHGLSLLLPYASLQEQEQGVQSRERY  
GluB1a/b 287 QEGYQQSQ---YGSQVAVRLOQCQNDORGETVIRVEHGLSLLLPYASLQEQEQGVQSRERY  
GluB2 283 QEGYQQSQ---YGSQVAVRLOQCQNDORGETVIRVEHGLSLLLPYASLQEQEQGVQSRERY  
GluB3 281 FLRAIDKDF---YTSQVAVRLOQCQNDORGETVIRVEHGLSLLLPYASLQEQEQGVQSRERY  
GluB4/5 288 QEGYQQSQ---YGSQVAVRLOQCQNDORGETVIRVEHGLSLLLPYASLQEQEQGVQSRERY  
GluB6 283 QEGYQQSQ---YGSQVAVRLOQCQNDORGETVIRVEHGLSLLLPYASLQEQEQGVQSRERY  
GluB7 284 QEGYQQSQ---YGSQVAVRLOQCQNDORGETVIRVEHGLSLLLPYASLQEQEQGVQSRERY  
GluC1 301 QEGYQQSQ---YGSQVAVRLOQCQNDORGETVIRVEHGLSLLLPYASLQEQEQGVQSRERY  
GluC2 287 QEGYQQSQ---YGSQVAVRLOQCQNDORGETVIRVEHGLSLLLPYASLQEQEQGVQSRERY  
GluD1 270 QEGYQQSQ---YGSQVAVRLOQCQNDORGETVIRVEHGLSLLLPYASLQEQEQGVQSRERY

GluA1 389 VVNNKGTVEFDELRRGQLLIIPOHYVVKKAQREGQYIAFKTNPNVSHLAGKNSIFRALPVDVIANAYRISREAEARLKNRGEDEGFAFTPIQYKS  
GluA2 389 VVNNKGTVEFDELRRGQLLIIPOHYVVKKAQREGQYIAFKTNPNVSHLAGKNSIFRALPVDVIANAYRISREAEARLKNRGEDEGFAFTPIQYKS  
GluA3 388 VVNNKGTVEFDELRRGQLLIIPOHYVVKKAQREGQYIAFKTNPNVSHLAGKNSIFRALPVDVIANAYRISREAEARLKNRGEDEGFAFTPIQYKS  
GluA4 388 VVNNKGTVEFDELRRGQLLIIPOHYVVKKAQREGQYIAFKTNPNVSHLAGKNSIFRALPVDVIANAYRISREAEARLKNRGEDEGFAFTPIQYKS  
GluB1a/b 385 VVNSFGKTVFDELRRGQLLIIPOHYVVKKAQREGQYIAFKTNPNVSHLAGKNSIFRALPVDVIANAYRISREAEARLKNRGEDEGFAFTPIQYKS  
GluB2 381 VVNSFGKTVFDELRRGQLLIIPOHYVVKKAQREGQYIAFKTNPNVSHLAGKNSIFRALPVDVIANAYRISREAEARLKNRGEDEGFAFTPIQYKS  
GluB3 381 VVNSFGKTVFDELRRGQLLIIPOHYVVKKAQREGQYIAFKTNPNVSHLAGKNSIFRALPVDVIANAYRISREAEARLKNRGEDEGFAFTPIQYKS  
GluB4/5 386 VVNSFGKTVFDELRRGQLLIIPOHYVVKKAQREGQYIAFKTNPNVSHLAGKNSIFRALPVDVIANAYRISREAEARLKNRGEDEGFAFTPIQYKS  
GluB6 381 VVNSFGKTVFDELRRGQLLIIPOHYVVKKAQREGQYIAFKTNPNVSHLAGKNSIFRALPVDVIANAYRISREAEARLKNRGEDEGFAFTPIQYKS  
GluB7 382 VVNSFGKTVFDELRRGQLLIIPOHYVVKKAQREGQYIAFKTNPNVSHLAGKNSIFRALPVDVIANAYRISREAEARLKNRGEDEGFAFTPIQYKS  
GluC1 401 VVNSFGKTVFDELRRGQLLIIPOHYVVKKAQREGQYIAFKTNPNVSHLAGKNSIFRALPVDVIANAYRISREAEARLKNRGEDEGFAFTPIQYKS  
GluC2 401 VVNSFGKTVFDELRRGQLLIIPOHYVVKKAQREGQYIAFKTNPNVSHLAGKNSIFRALPVDVIANAYRISREAEARLKNRGEDEGFAFTPIQYKS  
GluD1 368 VVNSFGKTVFDELRRGQLLIIPOHYVVKKAQREGQYIAFKTNPNVSHLAGKNSIFRALPVDVIANAYRISREAEARLKNRGEDEGFAFTPIQYKS

GluA1 489 YQDVNVAESS-----  
GluA2 489 YQDVNVAESS-----  
GluA3 488 SYQDISVSA-----  
GluA4 488 SYQDISVSA-----  
GluB1a/b 485 YYPGDSNESESETSE---  
GluB2 481 YYPGDSNESESETSE---  
GluB3 481 YYPGDSNESESETSE---  
GluB4/5 486 YYPGDSNESESETSE---  
GluB6 481 YYPGDSNESESETSE---  
GluB7 482 KIHQEYSNPNESETQEVI  
GluC1 501 QYAEIQINEK-----  
GluC2 501 QYAEIQINEK-----  
GluD1 468 SQRGYQLTEGLSLIGM-----

A

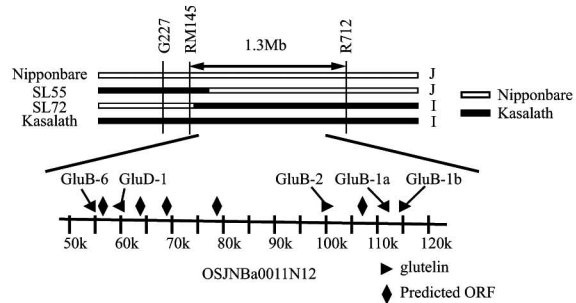

B

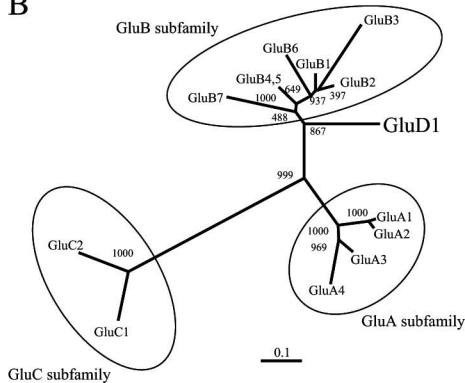

|             |      |                                                                                                                        |
|-------------|------|------------------------------------------------------------------------------------------------------------------------|
| Nipponbare  | 1    | ATGGCAACTACTACCTCTCTATTGTCTTCCTGTCTCTGTGCTCTTCTCTGGCTCCGCCTTTAGCCAAGGTGTAGATTGCATGGAAAGCCGACAAGGGCTTCCAGGCAGTGCAGATT   |
| Wataribune2 | 1    | .....                                                                                                                  |
| Kasalath    | 1    | .....G                                                                                                                 |
| NonaBokra   | 1    | .....G                                                                                                                 |
|             |      |                                                                                                                        |
| Nipponbare  | 121  | GATAGGTTACAAGCATTGACCCCTAAGAAGGTACGATCGGAAGCTGGGACACAGAGTACTTTGATGAGAGAAATGAGCAGTTTCGATGCCTGGTCTTTGTCTTTCGCGCGTG       |
| Wataribune2 | 121  | .....T                                                                                                                 |
| Kasalath    | 121  | .....C                                                                                                                 |
| NonaBokra   | 121  | .....C                                                                                                                 |
|             |      |                                                                                                                        |
| Nipponbare  | 241  | ATTGAGCCACAAGGCCTTGTGGTGCCTGATACTCGAACACTCTGTCTAGCTACATAATCCAAGGAAAAGGTTACGTAGGATTGACTTTTCTGGTTGCCAGCAACACCAACA        |
| Wataribune2 | 241  | .....                                                                                                                  |
| Kasalath    | 241  | .....G                                                                                                                 |
| NonaBokra   | 241  | .....                                                                                                                  |
|             |      |                                                                                                                        |
| Nipponbare  | 361  | CAATTCCAACTATTGAACAAAGACAGAGCGACCAAGCTCATAAGTTTAGAGATGAGCACAGAAGATTACGAATTTAGGCAAGGGGATGTTGTTGCACTCCGGCTAGTGTGCACAT    |
| Wataribune2 | 361  | .....                                                                                                                  |
| Kasalath    | 361  | .....A                                                                                                                 |
| NonaBokra   | 361  | .....A                                                                                                                 |
|             |      |                                                                                                                        |
| Nipponbare  | 481  | TGGTCTACAATGGTGTGATACCCGGCTGTTGTTGTCTATGTTTATGACATAAAAAAGTTTGCTAATCAGCTTGAACCAAGGCAGAAGGATTTTATTAGCTGGTAACAACACAGAGA   |
| Wataribune2 | 481  | .....                                                                                                                  |
| Kasalath    | 481  | .....A                                                                                                                 |
| NonaBokra   | 481  | .....A                                                                                                                 |
|             |      |                                                                                                                        |
| Nipponbare  | 601  | GGGCAACAAATATTGAACATTCCATCTTCAACACTTGGACAAAATATTTAGTGGGTTCAATACTGAGTACTTAGCAGGCGCTTGAATAAACACGGAGGCTTCCAAGGGCTC        |
| Wataribune2 | 601  | .....                                                                                                                  |
| Kasalath    | 601  | .....G                                                                                                                 |
| NonaBokra   | 601  | .....G                                                                                                                 |
|             |      |                                                                                                                        |
| Nipponbare  | 721  | CAAAGTCAAATGACCAAGGGGAGATATCATTGAGTGAAAGCACGGGCTCAATTTGTTGAAACCCACATTAAACACAACGACAGGAAGAACATCGTCAATATCAACAGTCCAGTATCGT |
| Wataribune2 | 721  | .....                                                                                                                  |
| Kasalath    | 721  | .....CG                                                                                                                |
| NonaBokra   | 721  | .....CG                                                                                                                |
|             |      |                                                                                                                        |
| Nipponbare  | 841  | GAAGGACAATATAATGATTGGACGAGAATTTCTGACAATAAAGGCAAGGTTAAACATTGAAATCTAGCCCGCTGACTACTACAACCTCGTGCTGGAAGGATAACCCCTCTTAAAC    |
| Wataribune2 | 841  | .....                                                                                                                  |
| Kasalath    | 841  | .....C                                                                                                                 |
| NonaBokra   | 841  | .....C                                                                                                                 |
|             |      |                                                                                                                        |
| Nipponbare  | 961  | AACCAAAAGTTCCTATTCTCAACCTTATTGGAATGGTGTGCAAGAGTAAACTTATACAGAATGCTCTTCTCAACCTTCTGGAACATTAAATGCCATAGTGTAGTGATATCATC      |
| Wataribune2 | 961  | .....                                                                                                                  |
| Kasalath    | 961  | .....C                                                                                                                 |
| NonaBokra   | 961  | .....C                                                                                                                 |
|             |      |                                                                                                                        |
| Nipponbare  | 1081 | CAAGGAAGTGTGCGAGTACAGGTTGCCAATAATCAAGGAAGATCTGTGTTAATGGTGACTTCATCAGGGGCAACTTAAATATCATACCAAAAACCATGCCGTCATTAAGAAAGCCGAG |
| Wataribune2 | 1081 | .....                                                                                                                  |
| Kasalath    | 1081 | .....C                                                                                                                 |
| NonaBokra   | 1081 | .....C                                                                                                                 |
|             |      |                                                                                                                        |
| Nipponbare  | 1201 | CACAATGGTGCCAGTATGTCGCAATAAAGACAATTTGCGACCCTACGGTGAGTTGGGTTGCTGGAAGAACTCCATATTACGTGCATTGCCTGTAGATTGTTGCCAATGCTTATCGT   |
| Wataribune2 | 1201 | .....                                                                                                                  |
| Kasalath    | 1201 | .....CC                                                                                                                |
| NonaBokra   | 1201 | .....CC                                                                                                                |
|             |      |                                                                                                                        |
| Nipponbare  | 1321 | ATCTCGAGGGATGAAGCCCGACGCTAAGAATAATAGGCGAGTGAAGTTGCCCTTTTACTCTCGTTCCTCCCAAGAGCCAGCGGGGTACCAGTTCCTAACTGAAGGCCTCTCT       |
| Wataribune2 | 1321 | .....                                                                                                                  |
| Kasalath    | 1321 | .....G                                                                                                                 |
| NonaBokra   | 1321 | .....G                                                                                                                 |
|             |      |                                                                                                                        |
| Nipponbare  | 1441 | TTAATCGGCATGTAA                                                                                                        |
| Wataribune2 | 1441 | .....                                                                                                                  |
| Kasalath    | 1441 | .....                                                                                                                  |
| NonaBokra   | 1441 | .....                                                                                                                  |

|             |     |                                                                                             |
|-------------|-----|---------------------------------------------------------------------------------------------|
| Nipponbare  | 1   | MATTTSLLSCLCALLLAPLFSQGVDAWESRQGASRQCRFDRLQAFEP L R K V R S E A G D T E                     |
| Wataribune2 | 1   | .....V..                                                                                    |
| Kasalath    | 1   | .....E.....A.....V..                                                                        |
| Nona Bokra  | 1   | .....E.....A.....V..                                                                        |
| Nipponbare  | 61  | YFDERNEQFRCAGVFVIRRVIEPQGLVVP R Y S N T P A L A Y I I Q G K G Y V G L T F P G C P A T H Q Q |
| Wataribune2 | 61  | .....                                                                                       |
| Kasalath    | 61  | .....                                                                                       |
| Nona Bokra  | 61  | ...I.....                                                                                   |
| Nipponbare  | 121 | QFQLFEQRQSDQAHKFRDEHQIHEFRQGDVVALPASVAHWFYNGGDTPAVVVYVYDIKS                                 |
| Wataribune2 | 121 | .....                                                                                       |
| Kasalath    | 121 | .....                                                                                       |
| Nona Bokra  | 121 | .....                                                                                       |
| Nipponbare  | 181 | FANQLEPRQKEFLLAGNNQRGQQIFEHSIFQHSGQNI F S G F N T E V L S E A L G I N T E A S K R L         |
| Wataribune2 | 181 | .....                                                                                       |
| Kasalath    | 181 | .....A...                                                                                   |
| Nona Bokra  | 181 | .....A...                                                                                   |
| Nipponbare  | 241 | QSQNDQRGDIIRVKHGLQLLKPTLTQRQEEHRQYQQVYREGQYNGLDENFCTIKARVNI                                 |
| Wataribune2 | 241 | .....                                                                                       |
| Kasalath    | 241 | .....P.....                                                                                 |
| Nona Bokra  | 241 | .....P.....                                                                                 |
| Nipponbare  | 301 | ENPSRADYYNPRAGRITLLNNQKFPILNLI G M G A A R V N L Y Q N A L L S P F W N I N A H S V Y I I    |
| Wataribune2 | 301 | .....                                                                                       |
| Kasalath    | 301 | ...N.....                                                                                   |
| Nona Bokra  | 301 | ...N.....                                                                                   |
| Nipponbare  | 361 | QGSVRVQVANNQGRSVFNGVLHQQLLIIPQNHAVIKKA E H N G C Q Y V A I K T I S D P T V S W V            |
| Wataribune2 | 361 | .....                                                                                       |
| Kasalath    | 361 | ..AQ.....T..S.....PN.M..R..                                                                 |
| Nona Bokra  | 361 | ..AQ.....T..S.....PN.M..R..                                                                 |
| Nipponbare  | 421 | AGKNSILRALPVDVIANAYRISRDEARRLKNNRADEIGPFTPRFPQKSQRGYQFLTEGLS                                |
| Wataribune2 | 421 | .....                                                                                       |
| Kasalath    | 421 | .....A.....K...                                                                             |
| Nona Bokra  | 421 | .....A.....K...                                                                             |
| Nipponbare  | 481 | LIGM                                                                                        |
| Wataribune2 | 481 | ....                                                                                        |
| Kasalath    | 481 | ....                                                                                        |
| Nona Bokra  | 481 | ....                                                                                        |

↓ Proceccing site
